# Supplementary material for: The Psychology of Atopic Dermatitis
Source: MDPI journal article supplement (doi:10.3390/jcm13061602), 2024-03-11
Supplement: s1 [file s1]

**Supplemental Table S1. Summary of important findings from selected publications included in this review.**

| Reference [no.]<br>Title                                                                                                  | Objective                                                                                                                                                          | Study design/Type of article | Sample size, characteristics                                                   | Mental health condition assessed | Findings                                                                                                                                                                                                                                                                                                                                                                                                                                                                                                                                                                                                       |
|---------------------------------------------------------------------------------------------------------------------------|--------------------------------------------------------------------------------------------------------------------------------------------------------------------|------------------------------|--------------------------------------------------------------------------------|----------------------------------|----------------------------------------------------------------------------------------------------------------------------------------------------------------------------------------------------------------------------------------------------------------------------------------------------------------------------------------------------------------------------------------------------------------------------------------------------------------------------------------------------------------------------------------------------------------------------------------------------------------|
| Talamonti et al [2]<br><br>Quality of Life and Psychological Impact in Patients with Atopic Dermatitis                    | To determine the degree of psychological stress in patients with AD compared to healthy participants.                                                              | Cross-sectional              | Total of 352 adult patients<br><br>174 with AD<br><br>178 healthy participants | Alexithymia<br><br>Depression    | <ul style="list-style-type: none"> <li>• High TAS-20 and BDI scores among patients with AD</li> <li>• The prevalence of alexithymic personality features was 56.3% in patients with AD versus 21.3% in healthy controls [<math>p &lt; 0.001</math>]. Based on BDI scoring [BDI-21 <math>&gt; 13</math>], depression was suspected in a significantly higher number of patients with AD than in the control group [56.9% [99/174] vs. 15.7% [28/178]; <math>p &lt; 0.0001</math>]</li> </ul>                                                                                                                    |
| Frazaanfar et al [7]<br><br>Inflammation: A Contributor to Depressive Comorbidity in Inflammatory Skin Disease.           | The published literature from 2012-2017 was reviewed for evidence of a relationship between depression and inflammatory processes in the context of skin pathology | Review                       | NA                                                                             | Depression                       | <ul style="list-style-type: none"> <li>• The prevalence of depression and anxiety is particularly high in patients with autoimmune diseases, including inflammatory skin diseases such as AD.</li> <li>• A dysregulated immune response has been linked to the precipitation of depression in many patient populations</li> <li>• The findings, particularly the evidence from interventional clinical trials of targeted anti-cytokine therapies, suggest that pro-inflammatory cytokines associated with several skin diseases may be causally linked with the coexistent depressive symptomology</li> </ul> |
| Schonmann et al [9]<br><br>Atopic Eczema in Adulthood and Risk of Depression and Anxiety: A Population-Based Cohort Study | To explore the temporal relationship between atopic eczema and new depression/anxiety                                                                              | Matched cohort study         | 526,808 adults with AD<br><br>Matched to 2,569,030 adults without AD           | Depression<br><br>Anxiety        | <ul style="list-style-type: none"> <li>• Adults with AD are more likely to develop new depression and anxiety</li> <li>• AD was associated with increased incidence of new depression [HR, 1.14; 99% CI, 1.12-1.16] and anxiety [HR, 1.17; 99% CI, 1.14-1.19]</li> <li>• For depression, a dose-response relationship with AD severity was observed</li> </ul>                                                                                                                                                                                                                                                 |

|                                                                                                                                                    |                                                                                      |                               |                                                                                                                                                                                                                                                                                                    |                                                                                |                                                                                                                                                                                                                                                                                                                                                                                                                                                                                                                                                                                   |
|----------------------------------------------------------------------------------------------------------------------------------------------------|--------------------------------------------------------------------------------------|-------------------------------|----------------------------------------------------------------------------------------------------------------------------------------------------------------------------------------------------------------------------------------------------------------------------------------------------|--------------------------------------------------------------------------------|-----------------------------------------------------------------------------------------------------------------------------------------------------------------------------------------------------------------------------------------------------------------------------------------------------------------------------------------------------------------------------------------------------------------------------------------------------------------------------------------------------------------------------------------------------------------------------------|
| Chen et al [10]<br><br>Obsessive-compulsive disorder among patients with atopic dermatitis: a case-control study in the All of Us research program | To evaluate the association between AD and OCD in the All of Us research program     | Nested, case-control study    | 13,433 AD cases [mean age 60, 68% female] were identified, with 53,732 matched controls.<br><br>Cases and controls were well-matched by age, sex, and race/ethnicity [all $P > 0.850$ ]                                                                                                            | OCD                                                                            | <ul style="list-style-type: none"> <li>• Individuals with AD were more likely to have a clinical diagnosis of OCD [1.7% vs. 0.6%, <math>P &lt; 0.001</math>]</li> <li>• In the large, diverse cohort evaluated, there was a 2.87-fold increased odds of OCD among individuals with AD in the univariable analysis</li> <li>• Controlling for demographic factors and comorbidities a twofold increased risk was identified</li> </ul>                                                                                                                                             |
| Wan et al. [15]<br><br>Neuropsychiatric disorders in adults with atopic dermatitis: A population-based cohort study                                | Determine risk of incident neuropsychiatric disease among adults with AD by severity | Population-based cohort study | <p>A cohort study using electronic health records data from UK general practices from 1994 to 2015. Adults <math>\geq 18</math> years] with AD were matched on age, practice and index date to patients without AD.</p> <p>625,083 adults with AD were compared to 2,678,888 adults without AD</p> | Depression<br>Anxiety<br>OCD<br>Suicidality<br>ASD<br>ADHD<br>Bipolar disorder | <ul style="list-style-type: none"> <li>• AD was associated with higher risk of anxiety [HR 1.14 [1.13-1.15]], depression [1.14 [1.13-1.15]] and OCD [1.48 [1.38-1.58]] across all severities.</li> <li>• Mild or moderate AD was also associated with higher risk of autism, ADHD, bipolar disorder and suicidality.</li> <li>• Atopic dermatitis is associated with a higher risk of multiple neuropsychiatric conditions, but these risks differ by specific condition and AD severity.</li> <li>• Clinicians should inquire about mental health in patients with AD</li> </ul> |

|                                                                                                                                                                             |                                                                                                                                                                                                   |                                     |                                                            |                                                    |                                                                                                                                                                                                                                                                                                                                                                                                                                                                                                                                                                                                                                                                                                                           |
|-----------------------------------------------------------------------------------------------------------------------------------------------------------------------------|---------------------------------------------------------------------------------------------------------------------------------------------------------------------------------------------------|-------------------------------------|------------------------------------------------------------|----------------------------------------------------|---------------------------------------------------------------------------------------------------------------------------------------------------------------------------------------------------------------------------------------------------------------------------------------------------------------------------------------------------------------------------------------------------------------------------------------------------------------------------------------------------------------------------------------------------------------------------------------------------------------------------------------------------------------------------------------------------------------------------|
| Cameron et al [17]<br><br>Mind and skin:<br>Exploring the links between inflammation, sleep disturbance and neurocognitive function in patients with atopic dermatitis.     | To discuss recent findings on the putative links between AD, its association with itch, sleep disturbance and neuropsychiatric morbidity, including the role of inflammation in these conditions. | Review                              | NA                                                         | Sleep deprivation                                  | <ul style="list-style-type: none"> <li>Itch was thought to predominantly drive sleep disruption in AD.</li> <li>Changes in sleep influence immune cell distribution and the associated inflammatory cytokines, which suggests a bidirectional relationship between AD and sleep.</li> <li>Inflammation is a key driver in psychological symptoms and disorders.</li> <li>The link between cutaneous, systemic and possible brain inflammation could at least in part be driven by the sleep deprivation and itch-driven neuronal proliferation seen in AD.</li> </ul>                                                                                                                                                     |
| Rønnstad et al. [22]<br><br>Association of atopic dermatitis with depression, anxiety, and suicidal ideation in children and adults: A systematic review and meta-analysis. | To perform a systematic review and meta-analysis of the association between AD in children and adults and, respectively, depression, anxiety, and suicidal behavior                               | Systematic review and meta-analysis | NA                                                         | Depression<br><br>Anxiety<br><br>Suicidal ideation | <ul style="list-style-type: none"> <li>There was a significant association between adult AD and depression [pooled OR, 2.19; 95% CI, 1.87-2.57] and anxiety [pooled OR, 2.19; 95% CI, 1.75-2.73].</li> <li>AD was also associated with depression in children [pooled OR, 1.27; 95% CI, 1.12-1.45]; few data were available for anxiety.</li> <li>A positive association was found between AD in adults and adolescents and suicidal ideation [pooled OR, 4.32; 95% CI, 1.93-9.66].</li> <li>Only a few studies examined the risk of completed suicide, but the majority showed a positive association between completed suicide and AD.</li> <li>AD disease improvement appears to reduce mental health risks</li> </ul> |
| Cheng et al. [20]<br><br>Associations of Atopic Dermatitis with Attention Deficit/Hyperactivity Disorder and Autism Spectrum                                                | To systematically examine the existing evidence on the associations between AD, ADHD, and ASD                                                                                                     | Systematic review and meta-analysis | Total of 24 studies with 71,373,639 subjects were enrolled | ADHD<br><br>ASD                                    | <ul style="list-style-type: none"> <li>Significant associations of AD with ADHD [pooled OR: 1.28; 95% CI: 1.18-1.40] and ASD [pooled OR: 1.87; 95% CI: 1.30-2.68].</li> <li>Subgroup analyses revealed that the associations for ADHD were the most prominent in studies evaluating severe AD patients as well as in studies focusing on school-age children and adolescents [&gt;6 years old, age, &lt;18 years old]</li> </ul>                                                                                                                                                                                                                                                                                          |

|                                                                                                                                                                    |                                                                                                                                                                        |                       |                                                      |                          |                                                                                                                                                                                                                                                                                                                                                                                                                                                                                                    |
|--------------------------------------------------------------------------------------------------------------------------------------------------------------------|------------------------------------------------------------------------------------------------------------------------------------------------------------------------|-----------------------|------------------------------------------------------|--------------------------|----------------------------------------------------------------------------------------------------------------------------------------------------------------------------------------------------------------------------------------------------------------------------------------------------------------------------------------------------------------------------------------------------------------------------------------------------------------------------------------------------|
| Disorder: A<br>Systematic Review<br>and Meta-Analysis                                                                                                              |                                                                                                                                                                        |                       |                                                      |                          | <ul style="list-style-type: none"> <li>Among patients with AD, the pooled prevalence of ADHD was 6.6%, and the respective prevalence of ASD was 1.6%.</li> </ul>                                                                                                                                                                                                                                                                                                                                   |
| Zeiser et al [23]<br><br>Social and psychosocial effects on atopic eczema symptom severity - a scoping review of observational studies published from 1989 to 2019 | To search for and summarize observational studies that investigated the effects of psychosocial factors on symptoms in atopic eczema and to identify research gaps     | Scoping review        | 17 observational studies met the inclusion criteria  | Depression<br><br>Stress | <ul style="list-style-type: none"> <li>Several studies found significant results for an exacerbating effect of stress on AD severity.</li> <li>Depression is associated with AD severity</li> <li>The effect of depression as a consequence of AD severity is stronger than the effect as an exacerbating factor</li> <li>Illness identity, anger, frustration and psychosomatic states have been found to affect AD symptoms</li> </ul>                                                           |
| Holmes et al [51]<br><br>Alexithymia and Cutaneous Disease Morbidity: A Systematic Review                                                                          | To clarify alexithymia's prevalence in dermatology patients and further investigate alexithymia's impact on disease burden, psychosocial comorbidities, and treatment. | Systematic review     | 37 publications were included                        | Alexithymia              | <ul style="list-style-type: none"> <li>Data showed a markedly greater prevalence and severity of alexithymia in patients with AD and other skin disease compared to healthy controls</li> <li>Data consistently demonstrates a complex interplay between alexithymia, disease burden, and psychosocial comorbidity</li> <li>Identifying and addressing alexithymia in dermatology patients may improve treatment outcomes, associated comorbidities, and health-related quality of life</li> </ul> |
| Kyung et al. [71]<br><br>Association of atopic dermatitis with suicide risk among 788,411 adolescents: A                                                           | To assess the association of AD and suicidal behaviors among adolescents by analyzing data from the 3rd through the 13th annual Korean Youth Risk Behavior Web-based   | Cross-sectional study | A total of 788,411 adolescents completed the survey. | Suicide                  | <ul style="list-style-type: none"> <li>A total of 22% of adolescents had AD, with 34.7% reporting depression, 19% reporting suicide ideation, and 4.5% reporting suicide attempts.</li> <li>In a multivariate model, perception of stress, perceived unhappiness, and suicidal ideation were the most strongly influencing factors for depression, suicidal ideation, and suicidal attempts, respectively.</li> </ul>                                                                              |

|                                                                                                                                                     |                                                                                                               |                       |                                                                                                                                                            |                                                     |                                                                                                                                                                                                                                                                                                                                                                                                                                                                                                                                                                                                                                                                                                                               |
|-----------------------------------------------------------------------------------------------------------------------------------------------------|---------------------------------------------------------------------------------------------------------------|-----------------------|------------------------------------------------------------------------------------------------------------------------------------------------------------|-----------------------------------------------------|-------------------------------------------------------------------------------------------------------------------------------------------------------------------------------------------------------------------------------------------------------------------------------------------------------------------------------------------------------------------------------------------------------------------------------------------------------------------------------------------------------------------------------------------------------------------------------------------------------------------------------------------------------------------------------------------------------------------------------|
| Korean cross-sectional study                                                                                                                        | Surveys [completed from 2007 to 2017]                                                                         |                       |                                                                                                                                                            |                                                     | <ul style="list-style-type: none"> <li>This study highlights the importance of evaluating mental health in patients with chronic AD</li> </ul>                                                                                                                                                                                                                                                                                                                                                                                                                                                                                                                                                                                |
| <p>Leung et al [6]</p> <p>Association of atopic dermatitis and suicide: more than a coincidence?</p>                                                | NA                                                                                                            | Editorial             | NA                                                                                                                                                         | <p>Depression</p> <p>Suicidality</p>                | <ul style="list-style-type: none"> <li>Beyond the characteristic skin inflammation of AD, there has been an increasing appreciation of its systemic effects</li> <li>These systemic effects may be due to the spill over of proinflammatory cytokines such as interleukin [IL]-4, IL-13, IL-17, thymic stromal lymphopoietin, IL-33, and interferon gamma from the skin into the circulation.</li> <li>There may be a biologic connection between systemic type 2 immune activation and mental disorders described in AD [anxiety, depression and increased risk of suicide]</li> <li>Therapeutic biologics used to treat AD that block the action of IL-4 and IL-13 improve quality of life and reduce depression</li> </ul> |
| <p>Vittrup et al. [88]</p> <p>The association between atopic dermatitis, cognitive function and school performance in children and young adults</p> | To examine the association between hospital-managed paediatric AD, school performance and cognitive function. | Cross-sectional study | Data was collected from the Danish national registers; between 2001 and 2019.                                                                              | <p>School performance</p> <p>Cognitive function</p> | <ul style="list-style-type: none"> <li>AD, in particular when severe, is associated with lower school performance in childhood and IQ in young men, which can interfere with academic achievements in life.</li> <li>Optimization of treatment of children with AD and specific educational support to children with severe AD could be needed</li> </ul>                                                                                                                                                                                                                                                                                                                                                                     |
| <p>Pan et al [91]</p> <p>Atopic dermatitis and dementia risk: A nationwide longitudinal study.</p>                                                  | To assess the temporal association of AD with subsequent dementia.                                            | Longitudinal study    | Patients with AD aged 45 years and older [n = 1059] and 1:10 matched controls [n = 10,590] from the Taiwan National Health Insurance Research Database and | Dementia                                            | <ul style="list-style-type: none"> <li>After adjustments for dementia-related comorbidities, patients with AD were found to be more likely to develop any dementia [HR, 2.02; 95% CI, 1.24-3.29], particularly Alzheimer's disease [HR, 3.74; 95% CI, 1.17-11.97], during the follow-up period than those in the control group.</li> <li>Moderate-to-severe AD was associated with a high subsequent dementia risk [HR, 4.64; 95% CI, 2.58-8.33].</li> <li>AD may be an independent risk factor for new-onset dementia.</li> </ul>                                                                                                                                                                                            |

|                                                                                        |                                                                                                                                                       |        |                                                                                            |                      |                                                                                                                                                                                                                                                                                                                                                                                                                                                                                                                                                                                                                                                                                                                                            |
|----------------------------------------------------------------------------------------|-------------------------------------------------------------------------------------------------------------------------------------------------------|--------|--------------------------------------------------------------------------------------------|----------------------|--------------------------------------------------------------------------------------------------------------------------------------------------------------------------------------------------------------------------------------------------------------------------------------------------------------------------------------------------------------------------------------------------------------------------------------------------------------------------------------------------------------------------------------------------------------------------------------------------------------------------------------------------------------------------------------------------------------------------------------------|
|                                                                                        |                                                                                                                                                       |        | reviewed their subsequent dementia development from the enrollment date to the end of 2013 |                      |                                                                                                                                                                                                                                                                                                                                                                                                                                                                                                                                                                                                                                                                                                                                            |
| Wen et al [92]<br><br>The link between cutaneous inflammation and cognitive impairment | To focus on the link between cognitive impairment [CI] and inflammatory skin disorders, and discuss the possible role of cutaneous inflammation in CI | Review | NA                                                                                         | Cognitive impairment | <ul style="list-style-type: none"> <li>• The incidence of CI is higher in subjects with certain inflammatory skin disorders, including psoriasis and chronic eczematous dermatitis.</li> <li>• Epidermal dysfunction could contribute to the development of chronic low-grade inflammation, also termed 'inflammaging', in the elderly.</li> <li>• The evidence of CI in patients with inflammatory dermatoses suggests a link between cutaneous inflammation and CI.</li> <li>• Because of the pathogenic role of epidermal dysfunction in ageing-associated cutaneous inflammation, improvements in epidermal function could be an alternative approach for mitigation of the ageing-associated decline in cognitive function</li> </ul> |
